# Supplementary material
Source: publisher site journal article supplement (https://www.dovepress.com/get_supplementary_file.php?f=436062.docx)
Supplement: Supplementary file 1 [file get_supplementary_file.php]

**Supplementary Table 1 Systemic treatment during HAIC in the two groups in the full cohort and the match cohort**

| Treatment | Before PSM | | | After PSM | | |
| --- | --- | --- | --- | --- | --- | --- |
| ETV Group (n=522) | TDF Group (n=161) | *p* Value | ETV Group (n=408) | TDF Group (n=158) | *p* Value |
| Tyrosine kinase inhibitor |  |  |  |  |  |  |
| Sorafenib | 45 (8.6%) | 11 (6.8%) | 0.086 | 30 (7.4%) | 11 (7.0%) | 0.210 |
| Lenvatinib | 166 (31.8%) | 70 (43.5%) |  | 135 (33.1%) | 67 (42.4%) |  |
| Apatinib | 25 (4.8%) | 6 (3.7%) |  | 24 (5.9%) | 6 (3.8%) |  |
| Regorafenib | 2 (0.4%) | 1 (0.6%) |  | 1 (0.2%) | 1 (0.6%) |  |
| None | 284 (54.4%) | 73 (45.3%) |  | 218 (54.3%) | 73 (46.2%) |  |
| Anti-PDL1/PD1 |  |  |  |  |  |  |
| Durvalumab | 11 (2.1%) | 7 (4.3%) | 0.012 | 9 (2.2%) | 6 (3.8%) | 0.052 |
| Nivolumab | 4 (0.8%) | 0 |  | 3 (0.7%) | 0 |  |
| Pembrolizumab | 14 (2.7%) | 7 (4.3%) |  | 12 (2.9%) | 7 (4.4%) |  |
| Sintilimab | 65 (12.5%) | 32 (19.9%) |  | 54 (13.2%) | 32 (20.3%) |  |
| Tislelizumab | 28 (5.4%) | 14 (8.7%) |  | 21 (5.1%) | 14 (8.9%) |  |
| Toripalimab | 63 (12.1%) | 10 (6.2%) |  | 47 (11.5%) | 10 (6.3%) |  |
| Camrelizumab | 21 (4.0%) | 8 (5.0%) |  | 18 (4.4%) | 8 (5.1%) |  |
| None | 316 (60.5%) | 83 (51.6%) |  | 244 (59.8%) | 81 (51.3%) |  |

**Supplementary Table 2 HBV reactivation during HAIC and the ALBI grade remained stable or improved after HAIC in the two groups in the full cohort**

|  | | ETV Group | TDF Group | *p* Value |
| --- | --- | --- | --- | --- |
| All patients (n=683) | | n=522 | n=161 |  |
| HBV reactivation (N, %) | absence | 466 (89.3) | 151 (93.8) | 0.090 |
| presence | 56 (10.7) | 10 (6.2) |
| ALBI stable/better (N, %) | absence | 296 (56.7) | 68 (42.2) | 0.001 |
| presence | 226 (43.3) | 93 (57.8) |
| HAIC cycles<4 (n=375) | | n=280 | n=95 |  |
| HBV reactivation (N, %) | absence | 260 (92.9) | 89 (93.7) | 0.784 |
| presence | 20 (7.1) | 6 (6.3) |
| ALBI stable/better (N, %) | absence | 149 (53.2) | 38 (40.0) | 0.026 |
| presence | 131 (46.8) | 57 (60.0) |
| HAIC cycles≥4 (n=308) | | n=242 | n=66 |  |
| HBV reactivation (N, %) | absence | 206 (85.1) | 62 (93.9) | 0.059 |
| presence | 36 (14.9) | 4 (6.1) |
| ALBI stable/better (N, %) | absence | 147 (60.7) | 30 (45.5) | 0.026 |
| presence | 95 (39.3) | 36 (54.5) |

Categorical variables are presented as frequencies and percentages.

(A)
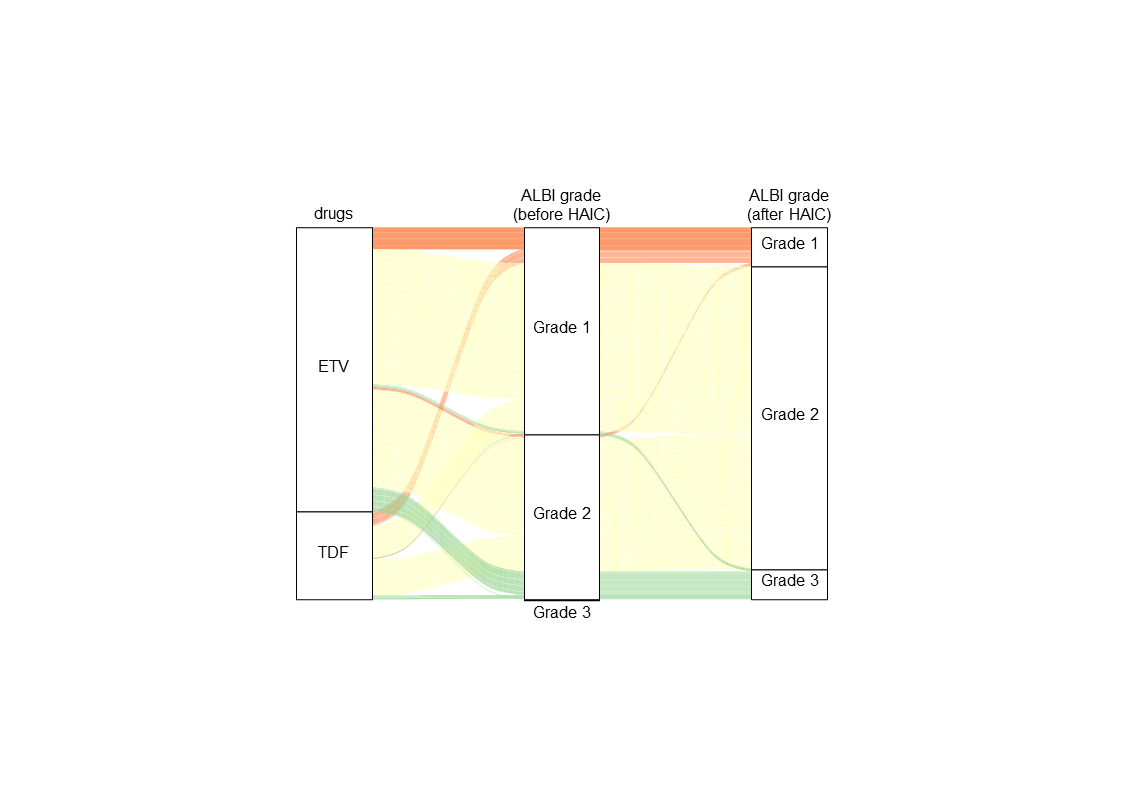
 (B)
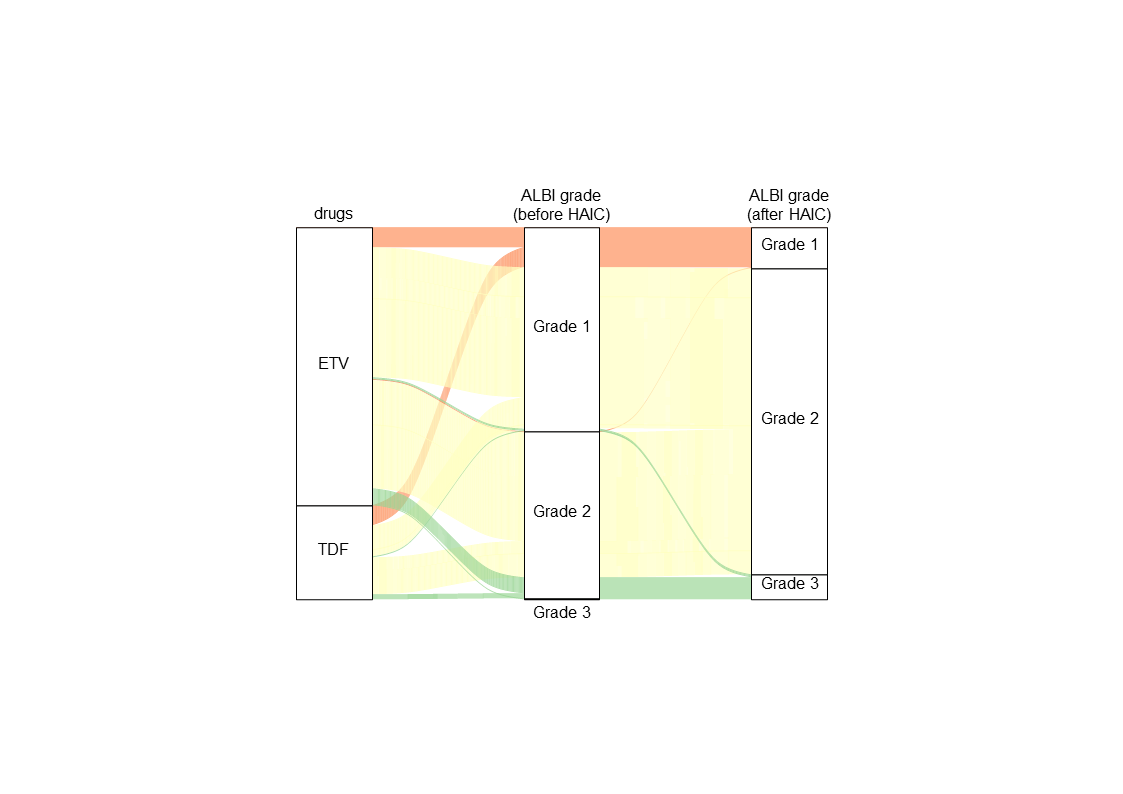


(C)
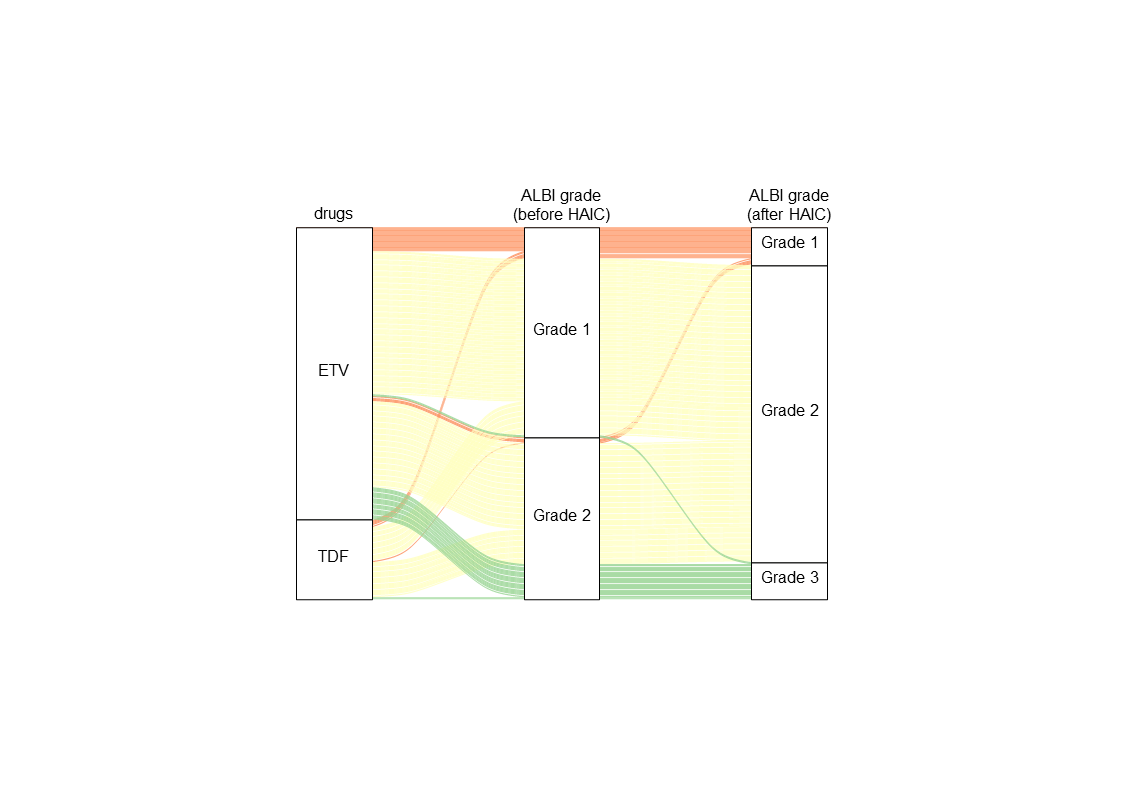


**Supplementary Figure 1** Sankey diagram of ALBI grade change after HAIC in the full cohort of all patients (A), of patients with < 4 cycles of HAIC (B), and of patients with ≥ 4 cycles of HAIC (C).
